# Supplementary material for: Inhibition of cyclooxygenase-2 activity in subchondral bone modifies a subtype of osteoarthritis
Source: PubMed Central journal article supplement (PMC6804921; doi:10.1038/s41413-019-0071-x), 2019-09-11

# Supplemental Figure 1

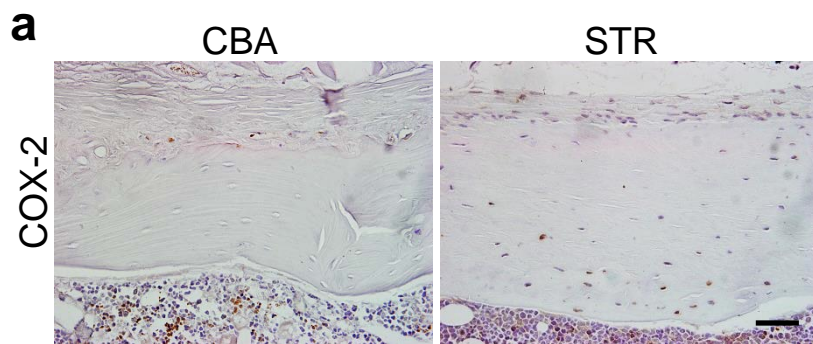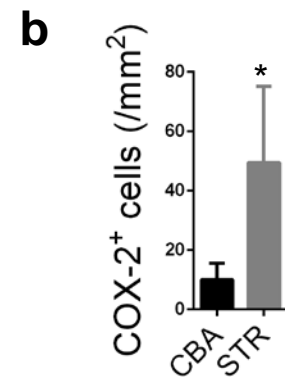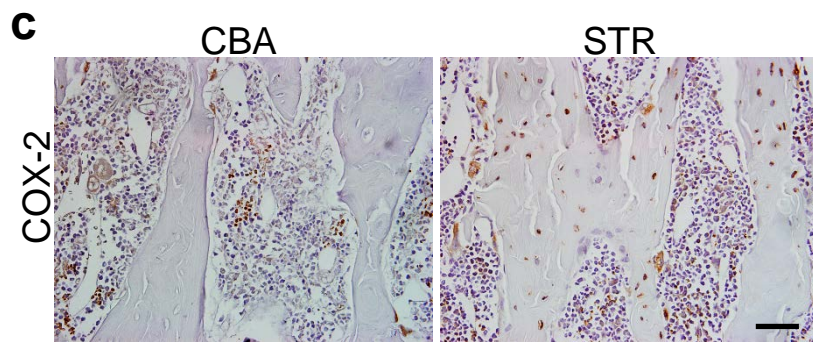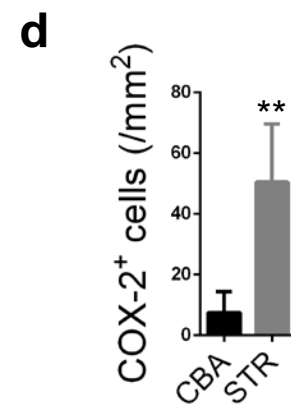

## Supplemental Figure 2

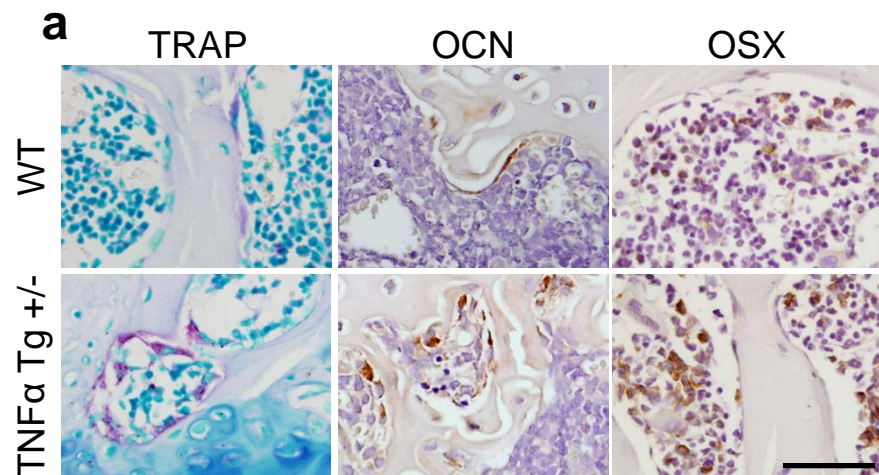

**b**

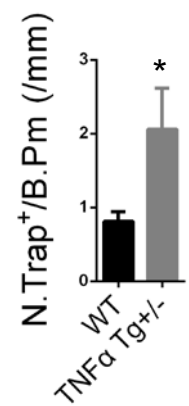

**c**

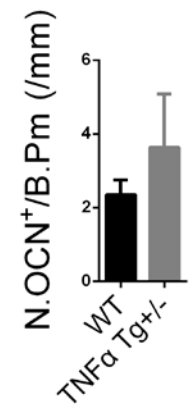

**d**

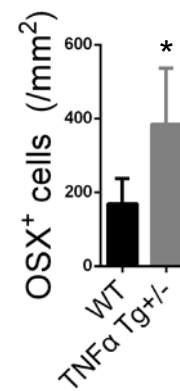

# Supplemental Figure 3

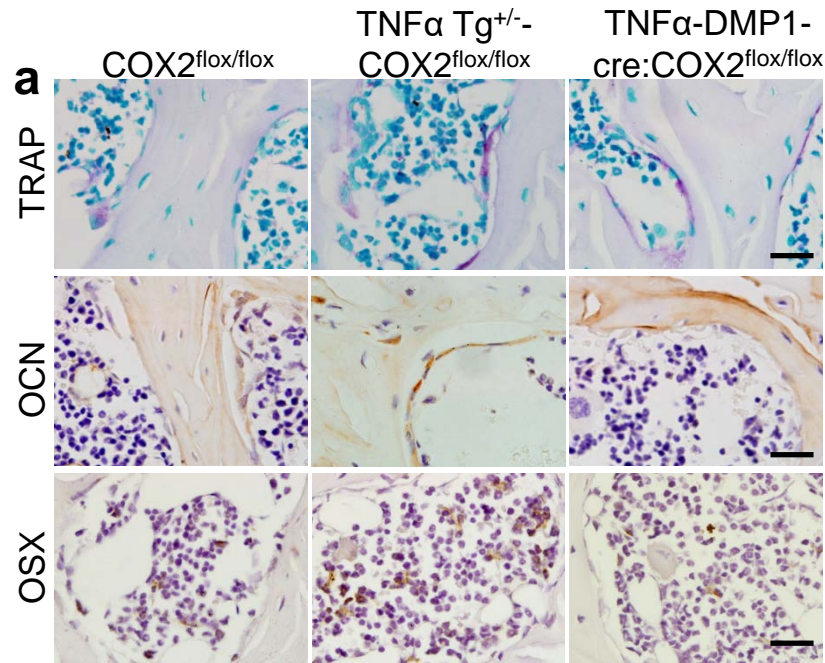

COX-2<sup>flox/flox</sup>  
 TNF $\alpha$  Tg<sup>+/-</sup>-COX-2<sup>flox/flox</sup>  
 TNF $\alpha$  Tg<sup>+/-</sup>-DMP1-cre:COX-2<sup>flox/flox</sup>

**b**

N.Trap<sup>+</sup>/B.Pm (/mm)

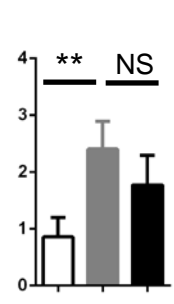

**c**

N.OCN<sup>+</sup>/B.Pm (/mm)

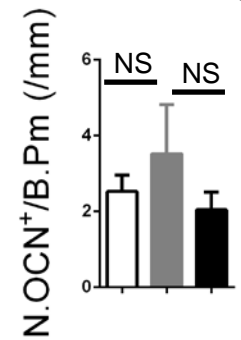

**d**

OSX<sup>+</sup> cells (/mm<sup>2</sup>)

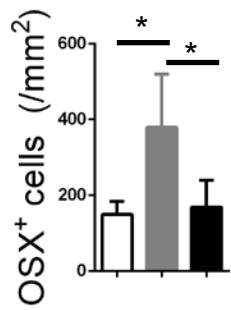

# Supplemental Figure 4

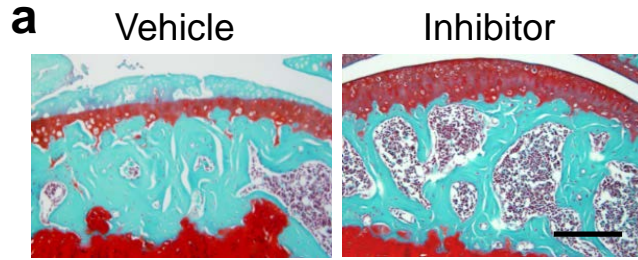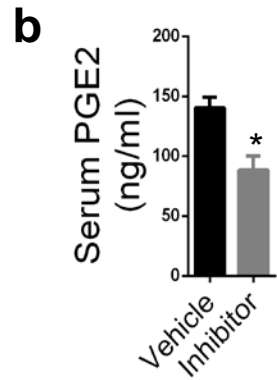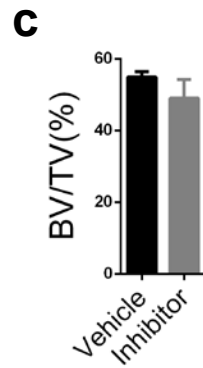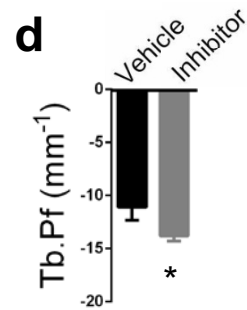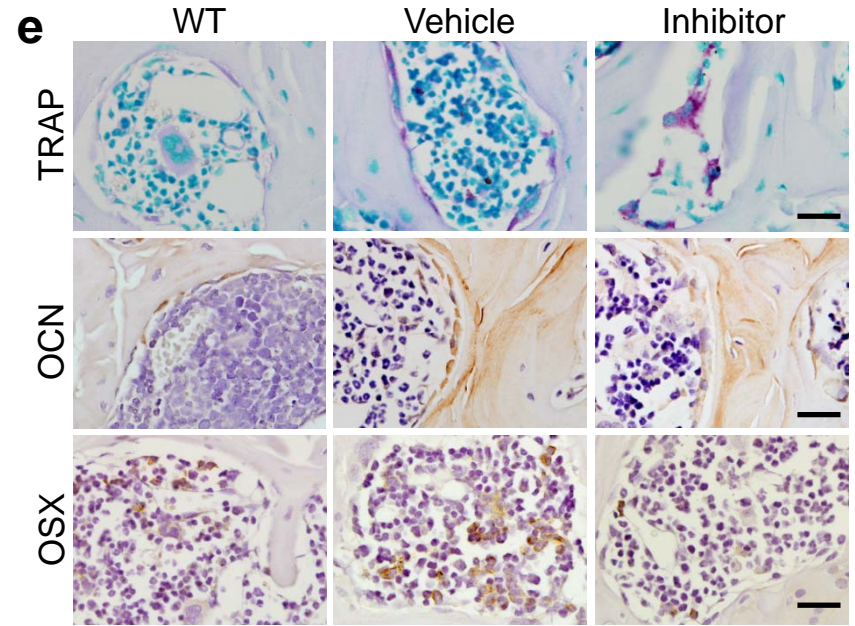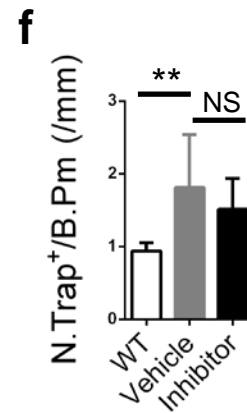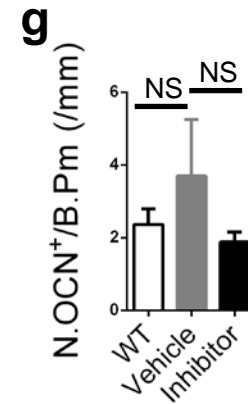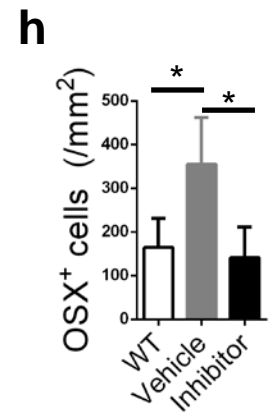

# Supplemental Figure 5

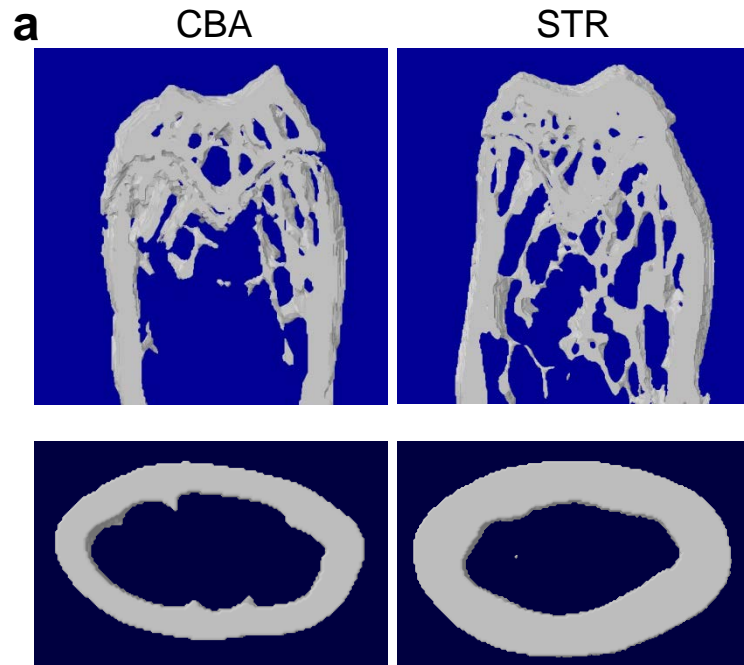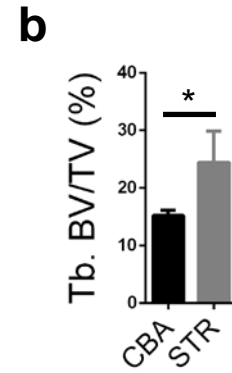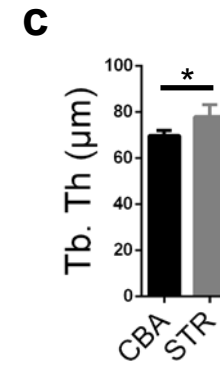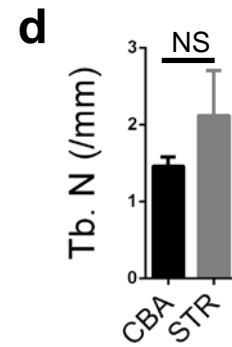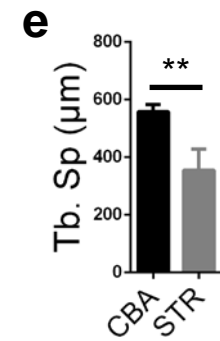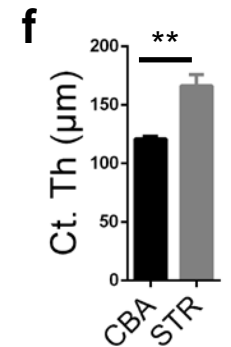

Supplement: 41413_2019_71_MOESM2_ESM.pdf [file 41413_2019_71_MOESM2_ESM.pdf]
